# Supplementary material for: Cooperative coupling of anisotropic phonon modes intensifies visible thermochromism in layered α-MoO3
Source: Royal Society of Chemistry journal article supplement (doi:10.1039/d2mh00090c), 2022-01-01
Supplement: d2mh00090c1.pdf [file d2mh00090c1.pdf]

*Supplementary Information for*

**Cooperative coupling of anisotropic phonon modes intensifies visible  
thermochromism in layered  $\alpha$ -MoO<sub>3</sub>**

Youngkwang Kim<sup>1),#</sup>, June Ho Lee<sup>1),#</sup>, Young Hwa Jung<sup>2)</sup>, Donghwa Lee<sup>1),\*</sup> and Junwoo Son<sup>1),\*</sup>

1) Department of Materials Science and Engineering (MSE), Pohang University of Science  
and Technology (POSTECH), Pohang 37673, Republic of Korea

2) Pohang Accelerator Laboratory, Pohang 37673, Republic of Korea

# These authors contributed equally to this work.

\* [jwson@postech.ac.kr](mailto:jwson@postech.ac.kr), [donghwa96@postech.ac.kr](mailto:donghwa96@postech.ac.kr)

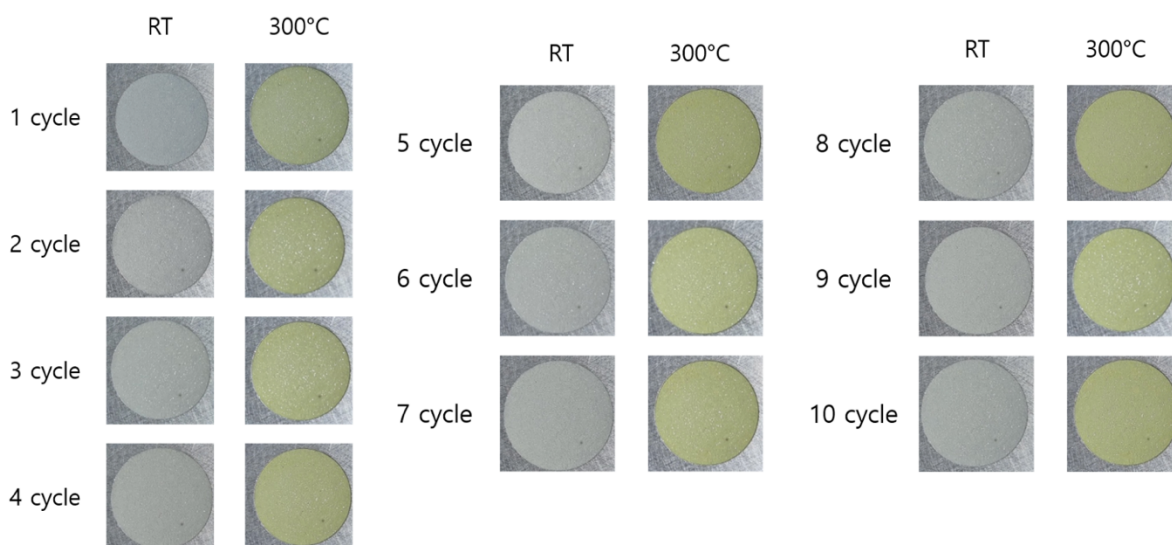

**Figure S1 | photographs of color changes of  $\alpha$ -MoO<sub>3</sub> during ten times of heating-cooling sweep.** the  $\alpha$ -MoO<sub>3</sub> samples changed from white into (greenish) yellow upon heating and then restored white upon cooling; This change is highly reproducible under an ambient atmosphere up to ten times of heating-cooling sweep.

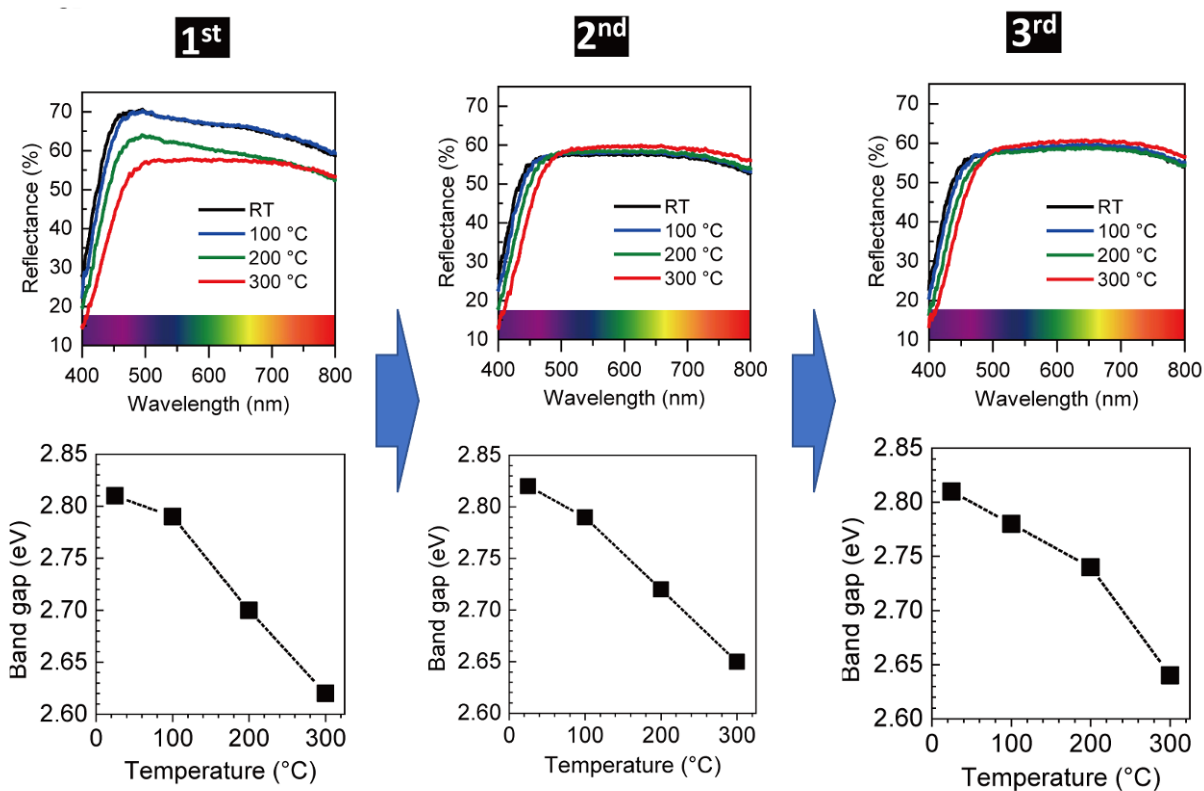

**Figure S2 | temperature-dependent diffuse reflectance spectra and estimated band gap from the Tauc's relationship as a function of temperature at the 1<sup>st</sup>, 2<sup>nd</sup>, 3<sup>rd</sup> heating-cooling sweeps.**

First of all, the shift of the absorption edge and corresponding band gap was fully reversible in the 2<sup>nd</sup> and 3<sup>rd</sup> consecutive heating/cooling cycle.

Secondly, slight irreversible change of thermochromism was observed in terms of quantitative analysis of color changes ( $L^*a^*b^*$  parameters) of  $\alpha$ -MoO<sub>3</sub> during initial (1<sup>st</sup>) and subsequent (2<sup>nd</sup>) heating and cooling sweep in Fig. 1. Namely,  $L^*a^*b^*$  parameters at room temperature was increased to 3.23 after 1<sup>st</sup> heating and cooling sweep.

Indeed, we also characterized this slight non-reversibility during 1<sup>st</sup> heating and cooling sweep by the diffuse reflectance spectrum. Higher reflectance was observed in the 1<sup>st</sup> sweep than in the 2<sup>nd</sup> sweep. The initial reflectance was not recovered after 1<sup>st</sup> heating and cooling sweep.

We think that the irreversible component of reflectance spectra appears to be related to the residual impurities after the synthesis of  $\alpha$ -MoO<sub>3</sub>. For example,  $\alpha$ -MoO<sub>3</sub> is likely to adsorb water molecules and/or volatile by-product related with nitrates and ammonium decomposition, which are detached at the temperature between 30 to 130 °C and/or between 130 to 250 °C, respectively, during heating

process (*AIP Conf. Proc.* 2265, 030716 (2020)). Considering the purity of our  $\alpha$ -MoO<sub>3</sub> powder (99.98 %), significant amounts of impurities are incorporated in an initial state, which also influence crystal structure and optical properties; these impurities are irreversibly removed as the temperature is increased. Once the impurities are fully removed after the 1<sup>st</sup> heating and cooling sweep, the fully reversible optical thermochromic behavior was observed; these unwanted impurity in as-received  $\alpha$ -MoO<sub>3</sub> is likely to contribute the irreversible optical property.

|                 | <b>R</b> | <b>G</b> | <b>B</b> | <b>L*</b> | <b>a*</b> | <b>b*</b> | <b>ΔEab</b> |
|-----------------|----------|----------|----------|-----------|-----------|-----------|-------------|
| <b>25 °C-1</b>  | 190      | 195      | 189      | 78.55     | -0.74     | -3.18     | 0.00        |
| <b>100 °C-1</b> | 182      | 188      | 170      | 75.58     | -3.55     | 3.26      | 7.63        |
| <b>200 °C-1</b> | 168      | 175      | 151      | 70.54     | -5.24     | 6.81      | 13.57       |
| <b>300 °C-1</b> | 178      | 180      | 118      | 71.96     | -9.50     | 27.77     | 32.83       |
| <b>25 °C-2</b>  | 186      | 188      | 179      | 76.13     | -0.39     | -1.06     | 3.24        |
| <b>100 °C-2</b> | 191      | 194      | 178      | 78.06     | -2.04     | 2.37      | 5.72        |
| <b>200 °C-2</b> | 189      | 194      | 157      | 77.38     | -6.57     | 13.31     | 17.54       |
| <b>300 °C-2</b> | 190      | 195      | 130      | 77.17     | -10.93    | 28.19     | 33.01       |

**Table S1** | Table of  $L^*a^*b^*$  parameters from image analysis during 1st and 2nd heating procedure. For quantitative analysis of color changes, the  $L^*a^*b^*$  parameters have been extracted from all photographs. These parameters were first converted to the linear RGB parameters and then to the XYZ parameter in CIE 1931 XYZ color space, accompanied by conversion to  $L^*a^*b^*$  parameters.

|                           | Atom | Wyckoff    | <i>x</i>   | <i>y</i>  | <i>z</i> | occ     | <i>U</i> <sub>iso</sub> |
|---------------------------|------|------------|------------|-----------|----------|---------|-------------------------|
| 25 °C-1                   | Mo1  | 4 <i>c</i> | 0.0717(4)  | 0.1023(1) | 0.25     | 0.99(3) | 0.035(1)                |
|                           | O1   | 4 <i>c</i> | 0.4782(23) | 0.4373(3) | 0.25     | 1.07(3) | 0.036(3)                |
|                           | O2   | 4 <i>c</i> | 0.5703(24) | 0.0904(3) | 0.25     | 1.12(3) | 0.048(3)                |
|                           | O3   | 4 <i>c</i> | 0.0465(21) | 0.2089(3) | 0.25     | 0.96(3) | 0.020(2)                |
| 300 °C                    | Mo1  | 4 <i>c</i> | 0.0726(4)  | 0.1010(1) | 0.25     | 0.98(1) | 0.027(1)                |
|                           | O1   | 4 <i>c</i> | 0.5004(21) | 0.4317(3) | 0.25     | 1.07(2) | 0.007(2)                |
|                           | O2   | 4 <i>c</i> | 0.5990(30) | 0.0877(4) | 0.25     | 1.12(2) | 0.092(4)                |
|                           | O3   | 4 <i>c</i> | 0.0523(23) | 0.2099(3) | 0.25     | 0.94(2) | 0.019(2)                |
| 25 °C-2<br>(after 300 °C) | Mo1  | 4 <i>c</i> | 0.0720(4)  | 0.1019(1) | 0.25     | 1.00(1) | 0.028(1)                |
|                           | O1   | 4 <i>c</i> | 0.4941(25) | 0.4363(3) | 0.25     | 1.11(2) | 0.023(3)                |
|                           | O2   | 4 <i>c</i> | 0.5846(27) | 0.0866(4) | 0.25     | 1.08(2) | 0.045(3)                |
|                           | O3   | 4 <i>c</i> | 0.0616(24) | 0.2100(3) | 0.25     | 0.93(2) | 0.016(2)                |

**Table S2** | Refined atomic parameters of  $\alpha$ -MoO<sub>3</sub> at different temperature using synchrotron powder XRD data and Rietveld refinements (PAL II-BL9B,  $\lambda = 1.5216 \text{ \AA}$ ).

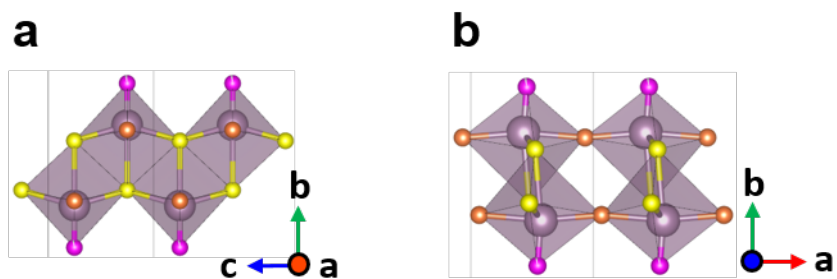

**Figure S3** | Schematic image of **a**, edge sharing and **b**, corner sharing in intra-layer  $[\text{MoO}_6]$  octahedron of  $\alpha\text{-MoO}_3$ . The yellow colored oxygen ions ( $\text{O}_1^{\text{eq.1}}$ ,  $\text{O}_1^{\text{eq.2}}$ ,  $\text{O}_1^{\text{ap.}}$ ) are located at the edge sharing, the orange colored oxygen ions ( $\text{O}_2^{\text{eq.1}}$ ,  $\text{O}_2^{\text{eq.2}}$ ) are located at the corner sharing. These unique layered-structure could induce anisotropic thermal expansion and visible thermochromism.

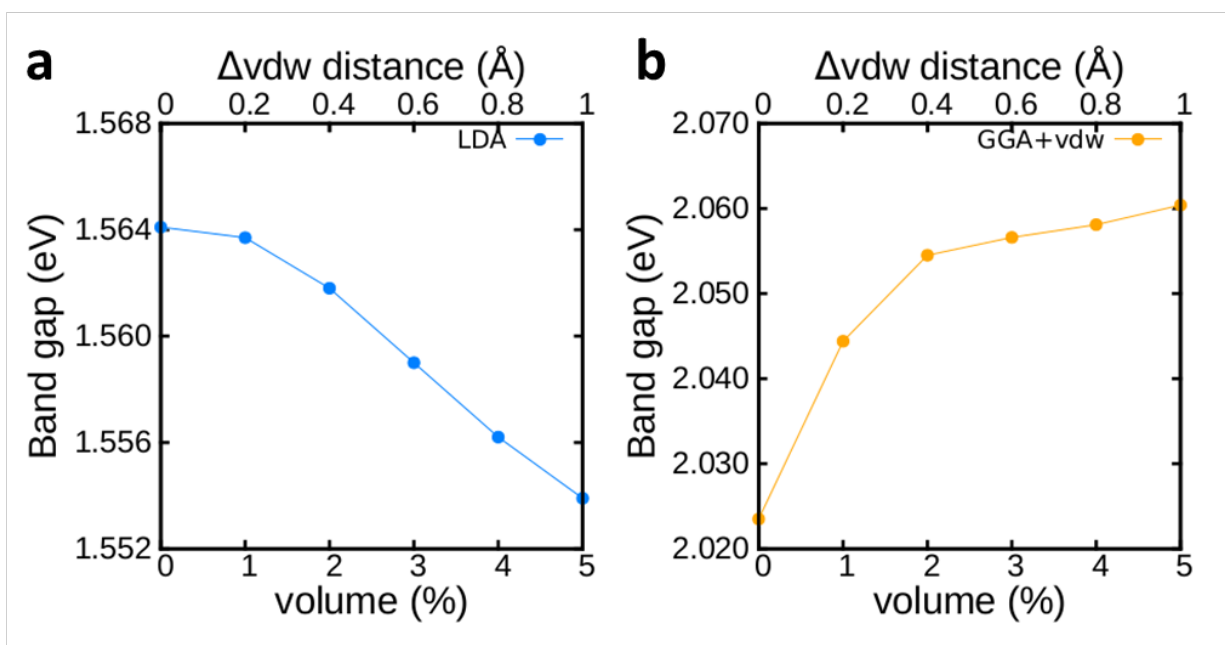

**Figure S4** | Band gap vs volume expansion of  $\alpha$ -MoO<sub>3</sub> calculated by **a**, LDA and **b**, GGA+U method. Atomic positions are fully relaxed at each expanded volume. For the LDA method, the bandgap decreases only by 0.01 eV for 1 Å increase in the VdW layer distance that is equivalent to the 5 % volume expansion. With the GGA+U method, the bandgap increases only by 0.04 eV for 1 Å increase in the VdW layer distance. These small change in band gap indicate that the change in VdW distance is not the main origin of the bandgap reduction at high temperature.



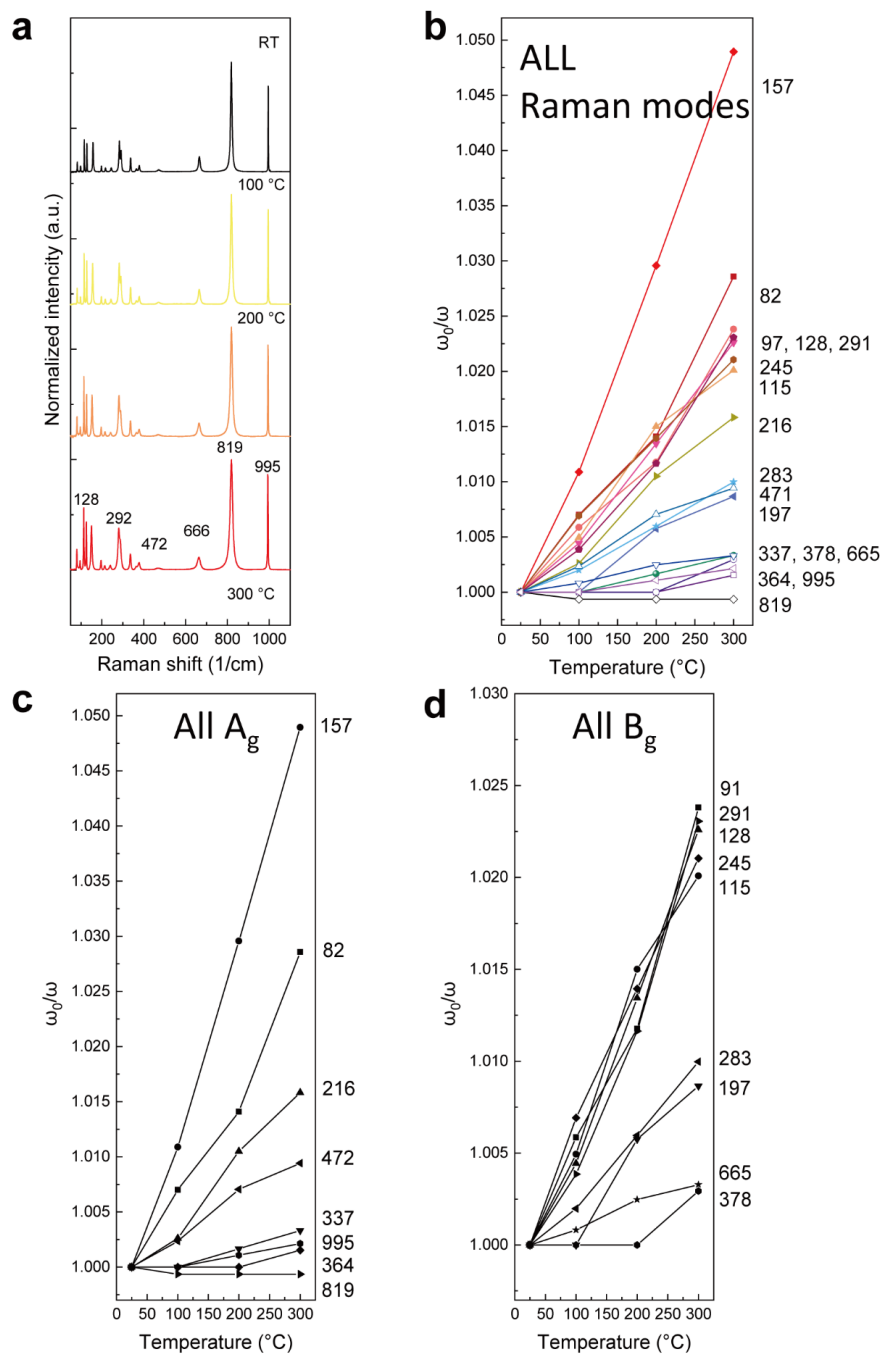

**Figure S5** | **a**, temperature-dependent Raman spectroscopy of  $\alpha$ - $\text{MoO}_3$ . Relative Raman frequency shift of all Raman modes (**b**), all  $A_g$  modes (**c**) and all  $B_g$  modes (**d**) in  $\alpha$ - $\text{MoO}_3$ . We selected specific Raman modes that is responsible for the visible thermochromism from all Raman modes in  $\alpha$ - $\text{MoO}_3$ .

| $D_{2h}$ | E | $C_2(z)$ | $C_2(y)$ | $C_2(x)$ | i | $\sigma(xy)$ | $\sigma(xz)$ | $\sigma(yz)$ |                 |       |
|----------|---|----------|----------|----------|---|--------------|--------------|--------------|-----------------|-------|
| $A_g$    | 1 | 1        | 1        | 1        | 1 | 1            | 1            | 1            | $x^2, y^2, z^2$ | Raman |
| $B_{1g}$ | 1 | 1        | -1       | -1       | 1 | 1            | -1           | -1           | $xy, J_z$       | Raman |
| $B_{2g}$ | 1 | -1       | 1        | -1       | 1 | -1           | 1            | -1           | $xz, J_y$       | Raman |
| $B_{3g}$ | 1 | -1       | -1       | 1        | 1 | -1           | -1           | 1            | $yz, J_x$       | Raman |
| $A_u$    | 1 | 1        | 1        | 1        | 1 | -1           | -1           | -1           |                 |       |
| $B_{1u}$ | 1 | 1        | -1       | -1       | 1 | -1           | 1            | 1            | z               | IR    |
| $B_{2u}$ | 1 | -1       | 1        | -1       | 1 | 1            | -1           | 1            | y               | IR    |
| $B_{3u}$ | 1 | -1       | -1       | 1        | 1 | 1            | 1            | -1           | x               | IR    |

**Table S3** | Character table for point group  $D_{2h}$  (mmm). The sign of each character indicate that symmetry operations are preserved (plus) and broken (minus).  $A_g$ ,  $B_{1g}$ ,  $B_{2g}$  and  $B_{3g}$  modes are Raman active, and  $B_{1u}$ ,  $B_{2u}$  and  $B_{3u}$  modes are IR active. Among four Raman active modes ( $A_g$ ,  $B_{1g}$ ,  $B_{2g}$  and  $B_{3g}$ ),  $A_g$  mode fully preserve 8 symmetry operations, whereas  $B_{ng}$  ( $n : 1, 2, 3$ ) modes break the 2 of 3 rotation and 2 of 3 mirror symmetry operation.

| Mode           | Ref <sup>1</sup><br>(cm <sup>-1</sup> ) | Ref <sup>2</sup><br>(cm <sup>-1</sup> ) | Exp.<br>(cm <sup>-1</sup> ) | Cal.<br>(cm <sup>-1</sup> ) | Induced phase |
|----------------|-----------------------------------------|-----------------------------------------|-----------------------------|-----------------------------|---------------|
| A <sub>g</sub> | 83                                      | 84                                      | 82                          | 77.85                       | <i>Pbnm</i>   |
|                | 158                                     | 162                                     | 157                         | 159.28                      |               |
|                | 217                                     | 230                                     | 216                         | 222.82                      |               |
|                | 337                                     | 327                                     | 337                         | 319.01                      |               |
|                | 365                                     | 365                                     | 364                         | 341.72                      |               |
|                | 473                                     | 473                                     | 472                         | 453.30                      |               |
|                | 819                                     | 822                                     | 819                         | 723.53                      |               |
|                | 995                                     | 998                                     | 995                         | 1009.20                     |               |

| Mode            | Ref <sup>1</sup><br>(cm <sup>-1</sup> ) | Ref <sup>2</sup><br>(cm <sup>-1</sup> ) | Exp.<br>(cm <sup>-1</sup> ) | Cal.<br>(cm <sup>-1</sup> ) | Induced phase           |
|-----------------|-----------------------------------------|-----------------------------------------|-----------------------------|-----------------------------|-------------------------|
| B <sub>1g</sub> | 99                                      | 102                                     | 97                          | 96.32                       | <i>P2<sub>1</sub>/m</i> |
|                 | 379                                     | 386                                     | 378                         | 355.78                      |                         |
| B <sub>2g</sub> | 116                                     | 118                                     | 115                         | 105.88                      | <i>P2<sub>1</sub>/c</i> |
|                 | 198                                     | 200                                     | 197                         | 198.51                      |                         |
|                 | 283                                     | 285                                     | 283                         | 259.76                      |                         |
| B <sub>3g</sub> | 129                                     | 138                                     | 128                         | 124.96                      | <i>P2<sub>1</sub>/c</i> |
|                 | 246                                     | 257                                     | 245                         | 237.47                      |                         |
|                 | 291                                     | 290                                     | 291                         | 283.11                      |                         |
|                 | 666                                     | 668                                     | 665                         | 650.86                      |                         |

**Table S4** | Experimental and calculated Raman modes. A<sub>g</sub> modes preserves their original structure (*Pbnm*), while the other modes cause a phase transition (*P2<sub>1</sub>/m* for B<sub>1g</sub> modes, *P2<sub>1</sub>/c* for B<sub>2g</sub> and B<sub>3g</sub> modes). Experimental and calculated results are well matched with prior results<sup>1,2</sup>

<sup>1</sup> L. Seguin, M. Figlarz, R. Cavagnat, J. C. Lassegues. Infrared and Raman spectra of MoO<sub>3</sub> molybdenum trioxides and MoO<sub>3</sub> · xH<sub>2</sub>O molybdenum trioxide hydrates, *Spectrochim. Acta A*, **51**, 1323, (1995)

<sup>2</sup> M.A. PY, K. Maschke, Intra- and Interlayer Contributions to the lattice vibrations in MoO<sub>3</sub>, *Physica*, 105B, 370-374, (1981)

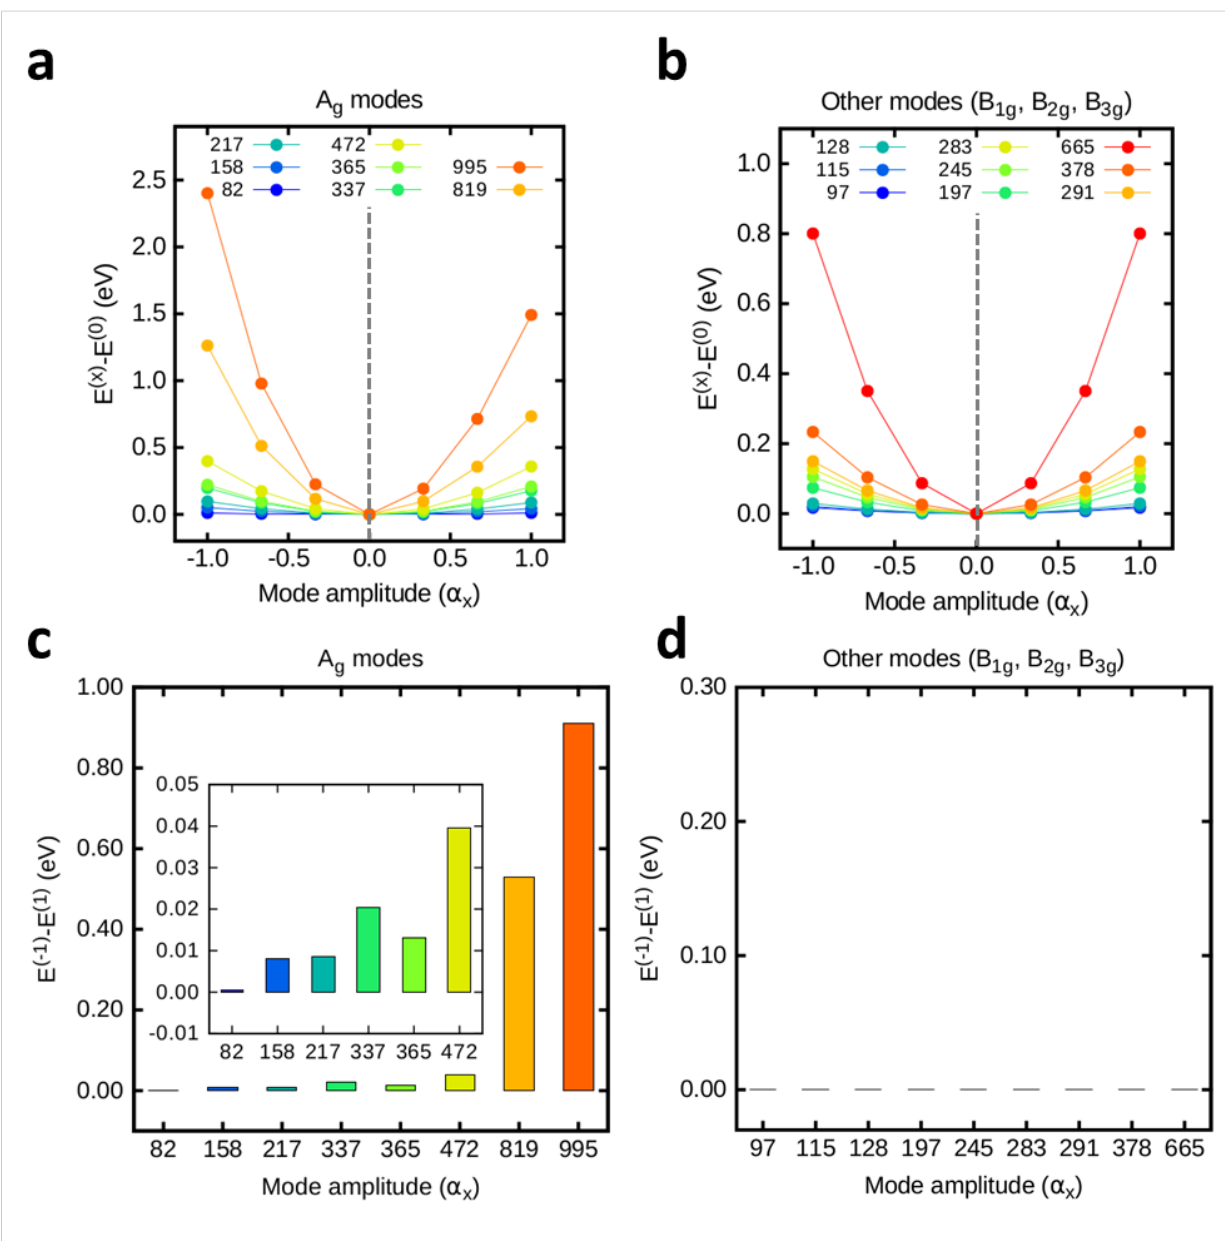

**Figure S6** | Relative Kohn-Sham (KS) energies as a function of Raman mode amplitude. Relative KS energy as a function of Raman mode amplitude  $\alpha_x$  for **a**,  $A_g$  and **b**, other ( $B_{1g}$ ,  $B_{2g}$ ,  $B_{3g}$ ) modes. KS energy difference between the structures with  $\alpha_x = -1$  and 1 amplitude for **c**,  $A_g$  and **d**, other ( $B_{1g}$ ,  $B_{2g}$ ,  $B_{3g}$ ) modes. As shown **Figure S4 c-d**  $A_g$  modes exhibits asymmetric potential while other modes ( $B_{1g}$ ,  $B_{2g}$ ,  $B_{3g}$ ) have symmetric potential as the displacement vector is changed.

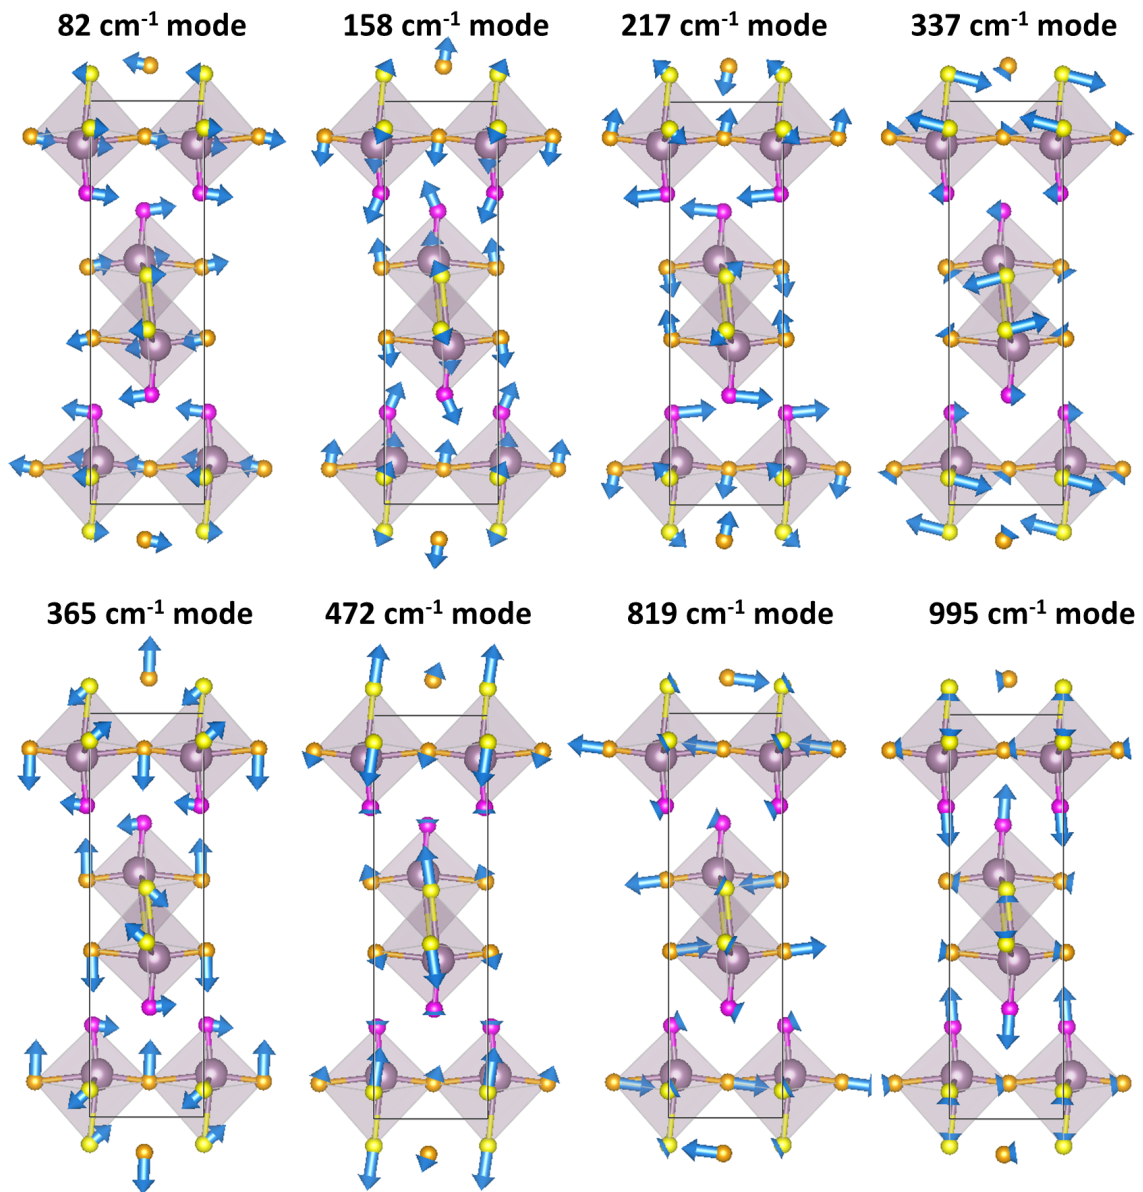

**Figure S7** | Displacement vectors of each  $A_g$  modes. Displacement vector (blue arrow) of each  $A_g$  (82, 158, 217, 337, 365, 472, 819, 995) modes.

|            |                                   | Structural variation. |                           |
|------------|-----------------------------------|-----------------------|---------------------------|
|            |                                   | Exp. (%)              | Cal. (471 + 995 mode) (%) |
| Apical     | Mo-O <sub>1</sub> <sup>ap</sup>   | 3.510                 | 4.630                     |
|            | Mo-O <sub>3</sub> <sup>ap</sup>   | 2.003                 | 2.680                     |
| Equatorial | Mo-O <sub>1</sub> <sup>eq.1</sup> | -1.130                | -2.026                    |
|            | Mo-O <sub>1</sub> <sup>eq.2</sup> | -1.130                | -2.026                    |
|            | Mo-O <sub>2</sub> <sup>eq.1</sup> | 2.793                 | 1.028                     |
|            | Mo-O <sub>2</sub> <sup>eq.2</sup> | -2.676                | -1.602                    |

**Table S5** | Variation of experimental and calculated bond length in MoO<sub>6</sub> octahedron. The calculated structural variation with the coupled contribution of 472 (with 1.2 amplitude) and 995 (with 0.4 amplitude) mode was well-matched with the experimental structural variation.

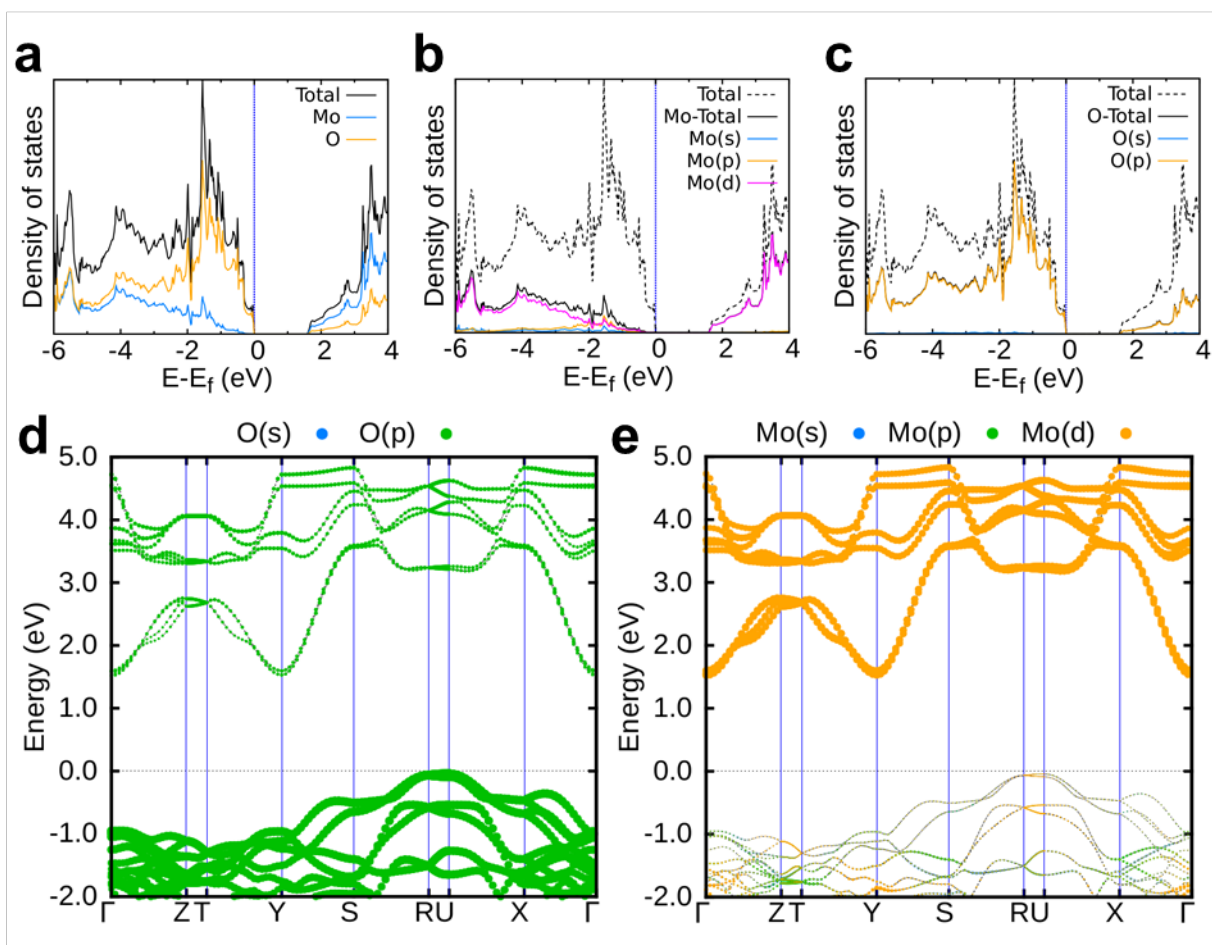

**Figure S8** | Electronic structure of  $\alpha$ - $\text{MoO}_3$ . **a**, Density of states **b**, Mo orbital decomposed and **c**, O orbital decomposed density of states of  $\text{MoO}_3$  structure. **d**, O orbital and **e**, Mo orbital projected-band structure of  $\text{MoO}_3$  structure. Valence band maximum / Conduction band minimum is located at U points /  $\Gamma$  point. Valence / Conduction band near the Fermi level is composed of O(p) / hybridized Mo(d)-O(p) orbital.

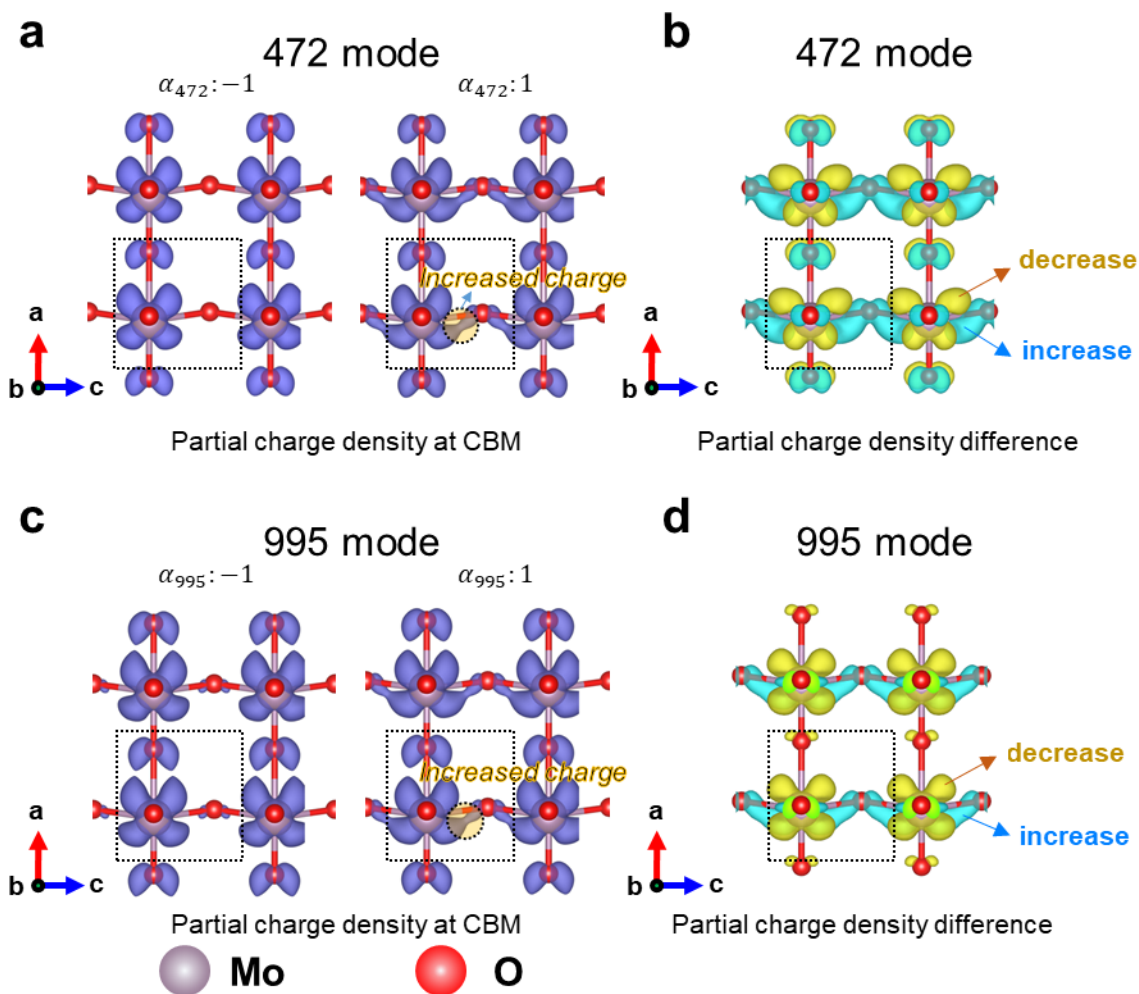

**Figure S9** | Partial charge density at CBM of 472 and 995 modes. Partial charge density (blue) at CBM with different mode amplitude ( $\alpha_x$  : -1 and 1) for **a**, 472 and **c**, 995 modes. Orange dot circle indicates increased charge density between Mo and O atom. The spatial charge density difference in CBM between the structures with different mode amplitude ( $\alpha_x$  : -1 and 1) for **b**, 472 and **d**, 995 modes. Cyan/yellow indicate increased / decreased partial charge density. The orbital overlap of the Mo  $4d$  – O  $2p$  hybridized state along the c-axis is enhanced with increasing  $\alpha_{472}$  and  $\alpha_{995}$ .



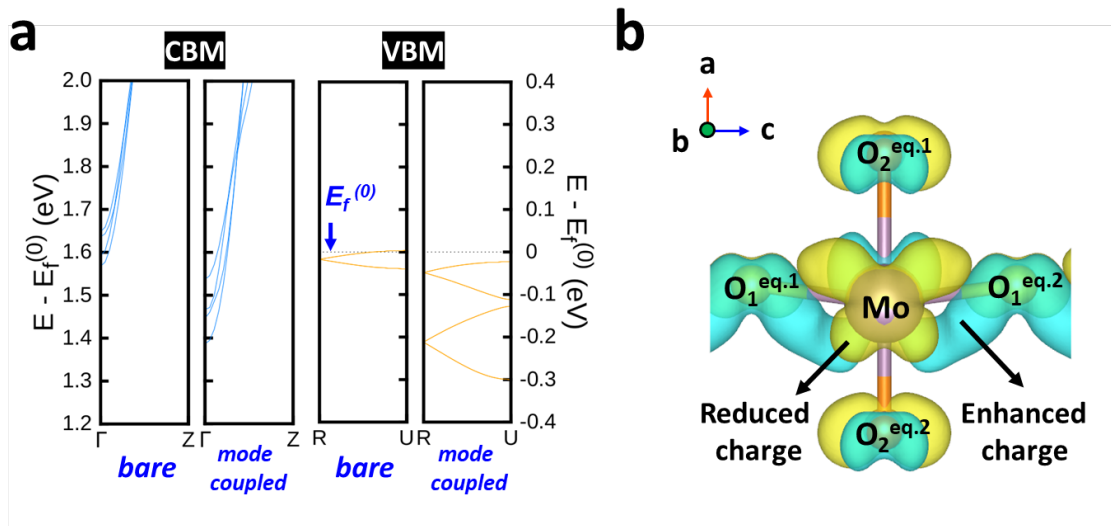

**Figure S10** | Partial charge density at CBM of 472 and 995 modes. **a**, Comparison of CBM (left), VBM(right) for the bare- and mode coupled-structure. **b**, The spatial charge density difference in CBM between the bare- and mode coupled- structure. For the mode coupled (472 and 995 modes) structure, the effect of mode on the band gap reduction is maintained.

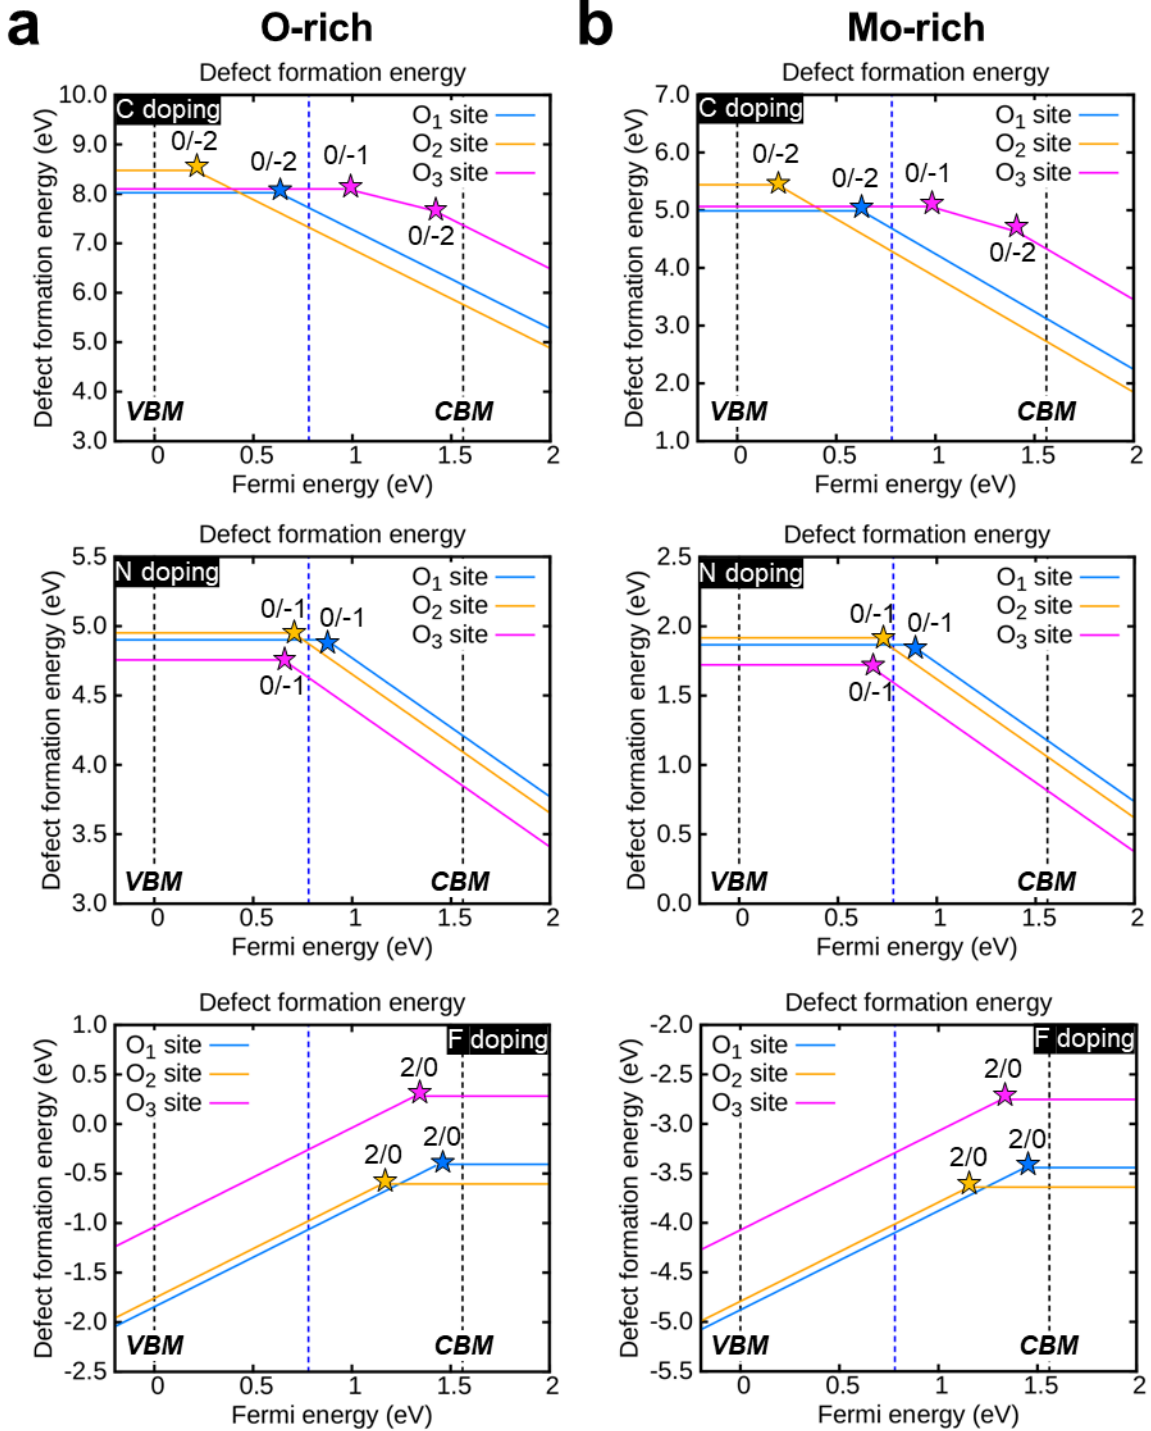

**Figure S11** | Defect formation energies of substitutional anion defects. Defect formation energies of substitutional C (top), N (middle), and F (bottom) defects on O<sub>1</sub> (blue), O<sub>2</sub> (orange), and O<sub>3</sub> (magenta) sites under a. O-rich and b. Mo-rich conditions. Vertical black dash lines indicate

valence band maximum (VBM) and conduction band minimum (CBM). The vertical blue dash line indicates center of band gap which mean the Fermi energy near the intrinsic level. We calculate Raman frequency using the charge state at the center of band gap. Filled stars indicate the charge transition level.

We conducted 8.33% (1 of 12 oxygens) substitutional anionic doping of representative doping element such as Carbon, Nitrogen, and Fluorine on the above mentioned particular three Oxygen site. The benefit of anionic doping strategies allow fine modification of target Raman vibrational motion of  $\alpha$ -MoO<sub>3</sub> because the effect of Molybdenum ions are connected to the all oxygen atom and therefore the all vibrational modes can be affected.

Interestingly, since the Raman frequency in 472 and 995 mode is related with the thermochromic structural expansion, the reduction in these frequency by doping implies the intensification of the thermal expansion at the same temperature compared to the pristine sample and thus the intensification of the temperature-dependent color difference. We believe that this possibility of reduction in temperature for thermochromic structural evolution will be crucial strategies to intensify the visible thermochromism in metal oxides given that the metal oxides generally required larger temperature difference compared to the organic thermochromic compound.
